# Supplementary material for: Methionine Deprivation Induces a Targetable Vulnerability in Triple-Negative Breast Cancer Cells by Enhancing TRAIL Receptor-2 Expression
Source: Oxford University Press journal article supplement (doi:10.1158/1078-0432.ccr-14-2792), 2015-02-27
Supplement: 10780432ccr142792-sup-140172_1_supp_0_nlrlry.xlsx [file 10780432ccr142792-sup-140172_1_supp_0_nlrlry.xlsx]

## Sheet: Sheet1
	MDA-MB-231						GILM 2
Average (+)	Average (-)	(-)/(+)	T-test	Raw FDR (%)	Representative Protein Description		Average (+)	Average (-)	(-)/(+)	T-test	Raw FDR (%)	Representative Protein Description
25.249	25.4331	Up	4.92628e-06	0.296562	sp|Q9NR30|DDX21_HUMAN Nucleolar RNA helicase 2 OS=Homo sapiens GN=DDX21 PE=1 SV=5		25.2538	22.2528	Down	1.77225e-05	1.0669	sp|Q9H223|EHD4_HUMAN EH domain-containing protein 4 OS=Homo sapiens GN=EHD4 PE=1 SV=1
23.5652	24.5332	Up	9.28933e-06	0.279609	sp|P31153|METK2_HUMAN S-adenosylmethionine synthase isoform type-2 OS=Homo sapiens GN=MAT2A PE=1 SV=1		24.0182	20.6603	Down	2.95651e-05	0.889911	tr|H7BZJ3|H7BZJ3_HUMAN Thioredoxin (Fragment) OS=Homo sapiens GN=PDIA3 PE=3 SV=1
21.6735	21.8738	Up	1.56471e-05	0.313986	sp|P41091|IF2G_HUMAN Eukaryotic translation initiation factor 2 subunit 3 OS=Homo sapiens GN=EIF2S3 PE=1 SV=3		23.5443	22.5155	Down	9.75587e-05	1.95768	sp|P30043|BLVRB_HUMAN Flavin reductase (NADPH) OS=Homo sapiens GN=BLVRB PE=1 SV=3
23.9389	23.452	Down	2.40182e-05	0.361474	tr|B4DUT8|B4DUT8_HUMAN Calponin-2 OS=Homo sapiens GN=CNN2 PE=2 SV=1		21.6746	23.9071	Up	0.000304579	4.58392	sp|Q9BWD1|THIC_HUMAN Acetyl-CoA acetyltransferase; cytosolic OS=Homo sapiens GN=ACAT2 PE=1 SV=2
22.7341	22.282	Down	9.81966e-05	1.18229	sp|P04181|OAT_HUMAN Ornithine aminotransferase; mitochondrial OS=Homo sapiens GN=OAT PE=1 SV=1		22.7111	25.7269	Up	0.000319555	3.84744	sp|P08238|HS90B_HUMAN Heat shock protein HSP 90-beta OS=Homo sapiens GN=HSP90AB1 PE=1 SV=4
24.0651	24.8301	Up	0.000100409	1.00743	sp|P08195-4|4F2_HUMAN Isoform 4 of 4F2 cell-surface antigen heavy chain OS=Homo sapiens GN=SLC3A2		23.9302	21.4295	Down	0.000345252	3.46403	sp|P25787|PSA2_HUMAN Proteasome subunit alpha type-2 OS=Homo sapiens GN=PSMA2 PE=1 SV=2
23.7509	22.948	Down	0.00011299	0.971712	sp|Q15417|CNN3_HUMAN Calponin-3 OS=Homo sapiens GN=CNN3 PE=1 SV=1		22.3416	24.6648	Up	0.000364446	3.13424	sp|O60506|HNRPQ_HUMAN Heterogeneous nuclear ribonucleoprotein Q OS=Homo sapiens GN=SYNCRIP PE=1 SV=2
25.1235	25.4004	Up	0.000130632	0.983008	sp|P60842|IF4A1_HUMAN Eukaryotic initiation factor 4A-I OS=Homo sapiens GN=EIF4A1 PE=1 SV=1		21.7772	21.8192	Up	0.00036823	2.77093	sp|Q9UH65|SWP70_HUMAN Switch-associated protein 70 OS=Homo sapiens GN=SWAP70 PE=1 SV=1
22.178	22.4785	Up	0.000136422	0.912514	sp|Q9NZ45|CISD1_HUMAN CDGSH iron-sulfur domain-containing protein 1 OS=Homo sapiens GN=CISD1 PE=1 SV=1		22.8537	23.9937	Up	0.000546662	3.65656	sp|P11766|ADHX_HUMAN Alcohol dehydrogenase class-3 OS=Homo sapiens GN=ADH5 PE=1 SV=4
23.5789	23.341	Down	0.000148728	0.895342	sp|Q99829|CPNE1_HUMAN Copine-1 OS=Homo sapiens GN=CPNE1 PE=1 SV=1		22.1932	20.8702	Down	0.00059682	3.59285	sp|P55196-5|AFAD_HUMAN Isoform 5 of Afadin OS=Homo sapiens GN=MLLT4
25.1584	25.5826	Up	0.000175514	0.960539	sp|P23284|PPIB_HUMAN Peptidyl-prolyl cis-trans isomerase B OS=Homo sapiens GN=PPIB PE=1 SV=2		21.3227	24.2369	Up	0.000611342	3.34571	sp|P37802|TAGL2_HUMAN Transgelin-2 OS=Homo sapiens GN=TAGLN2 PE=1 SV=3
22.295	22.7518	Up	0.000176129	0.883581	sp|Q15050|RRS1_HUMAN Ribosome biogenesis regulatory protein homolog OS=Homo sapiens GN=RRS1 PE=1 SV=2		22.7142	23.6764	Up	0.000708762	3.55562	sp|O75533|SF3B1_HUMAN Splicing factor 3B subunit 1 OS=Homo sapiens GN=SF3B1 PE=1 SV=3
24.4775	24.203	Down	0.000217741	1.00831	sp|O75874|IDHC_HUMAN Isocitrate dehydrogenase [NADP] cytoplasmic OS=Homo sapiens GN=IDH1 PE=1 SV=2		23.6739	22.7747	Down	0.000825589	3.82311	tr|E7EQ40|E7EQ40_HUMAN F-actin-capping protein subunit beta OS=Homo sapiens GN=CAPZB PE=4 SV=1
24.7091	25.1376	Up	0.000233304	1.00321	sp|Q96AG4|LRC59_HUMAN Leucine-rich repeat-containing protein 59 OS=Homo sapiens GN=LRRC59 PE=1 SV=1		21.854	22.4868	Up	0.000878121	3.77592	sp|P27694|RFA1_HUMAN Replication protein A 70 kDa DNA-binding subunit OS=Homo sapiens GN=RPA1 PE=1 SV=2
24.372	25.2081	Up	0.00023742	0.952845	sp|O76021|RL1D1_HUMAN Ribosomal L1 domain-containing protein 1 OS=Homo sapiens GN=RSL1D1 PE=1 SV=3		24.4627	23.0438	Down	0.00101222	4.06237	sp|Q00577|PURA_HUMAN Transcriptional activator protein Pur-alpha OS=Homo sapiens GN=PURA PE=1 SV=2
23.3638	23.8491	Up	0.000332618	1.25147	tr|Q3KQS4|Q3KQS4_HUMAN NOP2 protein OS=Homo sapiens GN=NOP2 PE=2 SV=1		25.0615	21.689	Down	0.00104833	3.94432	tr|F5H3I5|F5H3I5_HUMAN CDK5 regulatory subunit-associated protein 3 OS=Homo sapiens GN=CDK5RAP3 PE=4 SV=1
23.6902	23.9455	Up	0.000335923	1.18956	sp|P12081|SYHC_HUMAN Histidine--tRNA ligase; cytoplasmic OS=Homo sapiens GN=HARS PE=1 SV=2		23.2008	22.8787	Down	0.00107496	3.80663	sp|P29317|EPHA2_HUMAN Ephrin type-A receptor 2 OS=Homo sapiens GN=EPHA2 PE=1 SV=2
25.0577	24.9947	Down	0.000347011	1.16056	sp|P18669|PGAM1_HUMAN Phosphoglycerate mutase 1 OS=Homo sapiens GN=PGAM1 PE=1 SV=2		22.1846	21.7301	Down	0.00113864	3.80812	sp|Q562R1|ACTBL_HUMAN Beta-actin-like protein 2 OS=Homo sapiens GN=ACTBL2 PE=1 SV=2
25.4076	25.5712	Up	0.000363413	1.15144	sp|P07814|SYEP_HUMAN Bifunctional glutamate/proline--tRNA ligase OS=Homo sapiens GN=EPRS PE=1 SV=5		23.7649	27.453	Up	0.00115419	3.65696	sp|P21333|FLNA_HUMAN Filamin-A OS=Homo sapiens GN=FLNA PE=1 SV=4
24.1901	24.4698	Up	0.000375777	1.13109	tr|E9PRY8|E9PRY8_HUMAN Elongation factor 1-delta OS=Homo sapiens GN=EEF1D PE=3 SV=1		23.1616	21.1746	Down	0.00119814	3.6064	sp|P48047|ATPO_HUMAN ATP synthase subunit O; mitochondrial OS=Homo sapiens GN=ATP5O PE=1 SV=1
24.2209	24.4113	Up	0.000428353	1.22795	sp|Q16881|TRXR1_HUMAN Thioredoxin reductase 1; cytoplasmic OS=Homo sapiens GN=TXNRD1 PE=1 SV=3		25.1309	22.752	Down	0.00128244	3.67634	sp|P82970|HMGN5_HUMAN High mobility group nucleosome-binding domain-containing protein 5 OS=Homo sapiens GN=HMGN5 PE=1 SV=1
23.962	23.7528	Down	0.000493829	1.35129	sp|P60981|DEST_HUMAN Destrin OS=Homo sapiens GN=DSTN PE=1 SV=3		23.0202	22.8242	Down	0.00133498	3.653	sp|Q14157-5|UBP2L_HUMAN Isoform 5 of Ubiquitin-associated protein 2-like OS=Homo sapiens GN=UBAP2L
24.6548	24.4457	Down	0.000504443	1.32033	sp|P60903|S10AA_HUMAN Protein S100-A10 OS=Homo sapiens GN=S100A10 PE=1 SV=2		23.5045	22.069	Down	0.00137004	3.58592	sp|Q6P2E9|EDC4_HUMAN Enhancer of mRNA-decapping protein 4 OS=Homo sapiens GN=EDC4 PE=1 SV=1
25.6646	25.8681	Up	0.000602403	1.51103	sp|P13693|TCTP_HUMAN Translationally-controlled tumor protein OS=Homo sapiens GN=TPT1 PE=1 SV=1		23.7465	23.5847	Down	0.00140817	3.53216	sp|Q9NQC3|RTN4_HUMAN Reticulon-4 OS=Homo sapiens GN=RTN4 PE=1 SV=2
26.2251	25.8941	Down	0.000699755	1.68501	tr|D6PXK4|D6PXK4_HUMAN Alpha actinin 4 short isoform OS=Homo sapiens GN=ACTN4 PE=2 SV=1		25.1735	24.1375	Down	0.00142006	3.41952	sp|P62191|PRS4_HUMAN 26S protease regulatory subunit 4 OS=Homo sapiens GN=PSMC1 PE=1 SV=1
23.9794	23.7096	Down	0.000723612	1.67544	sp|P17844|DDX5_HUMAN Probable ATP-dependent RNA helicase DDX5 OS=Homo sapiens GN=DDX5 PE=1 SV=1		23.3928	28.1263	Up	0.00143029	3.31168	sp|Q15149|PLEC_HUMAN Plectin OS=Homo sapiens GN=PLEC PE=1 SV=3
24.2152	23.8878	Down	0.000738806	1.64726	tr|G3V1M7|G3V1M7_HUMAN Acyl-Coenzyme A dehydrogenase; very long chain; isoform CRA_b OS=Homo sapiens GN=ACADVL PE=3 SV=1		25.3992	24.033	Down	0.00153866	3.43065	sp|P27635|RL10_HUMAN 60S ribosomal protein L10 OS=Homo sapiens GN=RPL10 PE=1 SV=4
23.3935	24.623	Up	0.000776144	1.66871	sp|P06703|S10A6_HUMAN Protein S100-A6 OS=Homo sapiens GN=S100A6 PE=1 SV=1		23.5796	25.5826	Up	0.00164192	3.53013	sp|P23284|PPIB_HUMAN Peptidyl-prolyl cis-trans isomerase B OS=Homo sapiens GN=PPIB PE=1 SV=2
24.767	24.8808	Up	0.000864986	1.79559	sp|Q99623|PHB2_HUMAN Prohibitin-2 OS=Homo sapiens GN=PHB2 PE=1 SV=2		21.5433	18.6759	Down	0.00164227	3.40913	sp|P19105|ML12A_HUMAN Myosin regulatory light chain 12A OS=Homo sapiens GN=MYL12A PE=1 SV=2
22.2671	22.1275	Down	0.000921896	1.84994	sp|P43686|PRS6B_HUMAN 26S protease regulatory subunit 6B OS=Homo sapiens GN=PSMC4 PE=1 SV=2		22.3192	23.5354	Up	0.00172008	3.45162	sp|Q14847-2|LASP1_HUMAN Isoform 2 of LIM and SH3 domain protein 1 OS=Homo sapiens GN=LASP1
27.1538	26.7558	Down	0.000957779	1.85995	sp|P00558|PGK1_HUMAN Phosphoglycerate kinase 1 OS=Homo sapiens GN=PGK1 PE=1 SV=3		21.7501	24.0316	Up	0.00174176	3.38238	sp|Q9Y266|NUDC_HUMAN Nuclear migration protein nudC OS=Homo sapiens GN=NUDC PE=1 SV=1
21.7795	22.0603	Up	0.00112179	2.11036	sp|Q9NZL9|MAT2B_HUMAN Methionine adenosyltransferase 2 subunit beta OS=Homo sapiens GN=MAT2B PE=1 SV=1		24.1834	21.4263	Down	0.00180525	3.39612	tr|G5EA30|G5EA30_HUMAN CUG triplet repeat; RNA binding protein 1; isoform CRA_c OS=Homo sapiens GN=CELF1 PE=4 SV=1
23.744	23.5084	Down	0.00121386	2.21438	sp|P49915|GUAA_HUMAN GMP synthase [glutamine-hydrolyzing] OS=Homo sapiens GN=GMPS PE=1 SV=1		22.3006	23.0641	Up	0.00187305	3.41689	sp|O00233|PSMD9_HUMAN 26S proteasome non-ATPase regulatory subunit 9 OS=Homo sapiens GN=PSMD9 PE=1 SV=3
22.5017	22.7058	Up	0.00123354	2.18409	sp|Q8WXX5|DNJC9_HUMAN DnaJ homolog subfamily C member 9 OS=Homo sapiens GN=DNAJC9 PE=1 SV=1		20.7316	23.2153	Up	0.00191692	3.39408	tr|E9PEB5|E9PEB5_HUMAN Far upstream element-binding protein 1 OS=Homo sapiens GN=FUBP1 PE=4 SV=1
24.4259	24.2369	Down	0.00134844	2.31931	sp|P37802|TAGL2_HUMAN Transgelin-2 OS=Homo sapiens GN=TAGLN2 PE=1 SV=3		23.5175	24.1597	Up	0.00193262	3.32411	sp|P21589|5NTD_HUMAN 5'-nucleotidase OS=Homo sapiens GN=NT5E PE=1 SV=1
23.8071	23.1791	Down	0.00157198	2.6287	sp|P51114|FXR1_HUMAN Fragile X mental retardation syndrome-related protein 1 OS=Homo sapiens GN=FXR1 PE=1 SV=3		23.8674	22.222	Down	0.00193975	3.2437	tr|C9JS35|C9JS35_HUMAN Ubiquitin fusion degradation protein 1 homolog OS=Homo sapiens GN=UFD1L PE=4 SV=2
22.2897	21.8657	Down	0.00160371	2.60929	sp|Q9UQE7|SMC3_HUMAN Structural maintenance of chromosomes protein 3 OS=Homo sapiens GN=SMC3 PE=1 SV=2		23.7366	21.9344	Down	0.00197116	3.20713	tr|E7EQ04|E7EQ04_HUMAN Cytoplasmic FMR1-interacting protein 1 OS=Homo sapiens GN=CYFIP1 PE=4 SV=1
26.588	26.3637	Down	0.00171902	2.72329	sp|P14625|ENPL_HUMAN Endoplasmin OS=Homo sapiens GN=HSP90B1 PE=1 SV=1		22.091	24.8523	Up	0.00198046	3.13747	sp|P50454|SERPH_HUMAN Serpin H1 OS=Homo sapiens GN=SERPINH1 PE=1 SV=2
23.7995	23.3605	Down	0.00174103	2.68744	sp|Q9UNF1|MAGD2_HUMAN Melanoma-associated antigen D2 OS=Homo sapiens GN=MAGED2 PE=1 SV=2		22.8783	24.4978	Up	0.00198483	3.06376	sp|P55060|XPO2_HUMAN Exportin-2 OS=Homo sapiens GN=CSE1L PE=1 SV=3
21.5692	21.8048	Up	0.00178262	2.68284	sp|Q9NS69|TOM22_HUMAN Mitochondrial import receptor subunit TOM22 homolog OS=Homo sapiens GN=TOMM22 PE=1 SV=3		24.7022	23.4098	Down	0.0020878	3.14213	sp|O75643|U520_HUMAN U5 small nuclear ribonucleoprotein 200 kDa helicase OS=Homo sapiens GN=SNRNP200 PE=1 SV=2
21.7391	21.4392	Down	0.00182584	2.68087	sp|P04899-4|GNAI2_HUMAN Isoform sGi2 of Guanine nucleotide-binding protein G(i) subunit alpha-2 OS=Homo sapiens GN=GNAI2		23.3752	23.1625	Down	0.00216818	3.18352	tr|C9IZE4|C9IZE4_HUMAN 26S proteasome non-ATPase regulatory subunit 6 OS=Homo sapiens GN=PSMD6 PE=4 SV=1
22.7578	23.1127	Up	0.00185117	2.65335	sp|Q66K74|MAP1S_HUMAN Microtubule-associated protein 1S OS=Homo sapiens GN=MAP1S PE=1 SV=2		24.3981	26.1834	Up	0.00221171	3.17012	sp|P22626|ROA2_HUMAN Heterogeneous nuclear ribonucleoproteins A2/B1 OS=Homo sapiens GN=HNRNPA2B1 PE=1 SV=2
21.8382	22.2173	Up	0.00188757	2.64259	sp|Q9BZQ8|NIBAN_HUMAN Protein Niban OS=Homo sapiens GN=FAM129A PE=1 SV=1		25.0617	21.7126	Down	0.00222515	3.11522	sp|P62263|RS14_HUMAN 40S ribosomal protein S14 OS=Homo sapiens GN=RPS14 PE=1 SV=3
23.9128	23.7587	Down	0.00188858	2.58392	sp|P33176|KINH_HUMAN Kinesin-1 heavy chain OS=Homo sapiens GN=KIF5B PE=1 SV=1		24.3813	23.3382	Down	0.00236323	3.23333	sp|P04632|CPNS1_HUMAN Calpain small subunit 1 OS=Homo sapiens GN=CAPNS1 PE=1 SV=1
25.0686	25.2511	Up	0.00189935	2.54091	sp|P24534|EF1B_HUMAN Elongation factor 1-beta OS=Homo sapiens GN=EEF1B2 PE=1 SV=3		22.4842	23.1473	Up	0.00243345	3.25542	sp|P55327-3|TPD52_HUMAN Isoform 3 of Tumor protein D52 OS=Homo sapiens GN=TPD52
22.6305	22.7027	Up	0.00190998	2.49958	sp|P10620|MGST1_HUMAN Microsomal glutathione S-transferase 1 OS=Homo sapiens GN=MGST1 PE=1 SV=1		26.2454	23.373	Down	0.00243402	3.18539	sp|O94826|TOM70_HUMAN Mitochondrial import receptor subunit TOM70 OS=Homo sapiens GN=TOMM70A PE=1 SV=1
23.3285	23.7918	Up	0.00194135	2.48658	sp|P05161|ISG15_HUMAN Ubiquitin-like protein ISG15 OS=Homo sapiens GN=ISG15 PE=1 SV=5		21.8666	24.5077	Up	0.0024611	3.15231	tr|F8VXB4|F8VXB4_HUMAN Keratin; type II cytoskeletal 8 OS=Homo sapiens GN=KRT8 PE=3 SV=1
23.0605	22.7423	Down	0.00198735	2.49247	sp|P63279|UBC9_HUMAN SUMO-conjugating enzyme UBC9 OS=Homo sapiens GN=UBE2I PE=1 SV=1		21.8824	22.8501	Up	0.00253044	3.17359	sp|Q15459|SF3A1_HUMAN Splicing factor 3A subunit 1 OS=Homo sapiens GN=SF3A1 PE=1 SV=1
22.2555	23.0923	Up	0.00211433	2.5976	sp|P84095|RHOG_HUMAN Rho-related GTP-binding protein RhoG OS=Homo sapiens GN=RHOG PE=1 SV=1		22.2771	25.4709	Up	0.00255668	3.14107	sp|P07437|TBB5_HUMAN Tubulin beta chain OS=Homo sapiens GN=TUBB PE=1 SV=2
22.4076	22.0703	Down	0.00217363	2.61705	sp|Q00341|VIGLN_HUMAN Vigilin OS=Homo sapiens GN=HDLBP PE=1 SV=2		21.3282	24.063	Up	0.00258507	3.11242	sp|Q9UKM9|RALY_HUMAN RNA-binding protein Raly OS=Homo sapiens GN=RALY PE=1 SV=1
21.8299	21.5027	Down	0.00225557	2.66246	sp|Q13418|ILK_HUMAN Integrin-linked protein kinase OS=Homo sapiens GN=ILK PE=1 SV=2		23.0351	21.0911	Down	0.00258568	3.05212	sp|P13674-2|P4HA1_HUMAN Isoform 2 of Prolyl 4-hydroxylase subunit alpha-1 OS=Homo sapiens GN=P4HA1
24.6206	24.89	Up	0.00226932	2.62718	sp|P54577|SYYC_HUMAN Tyrosine--tRNA ligase; cytoplasmic OS=Homo sapiens GN=YARS PE=1 SV=4		21.8545	21.7631	Down	0.0025976	3.00723	tr|B3KSQ1|B3KSQ1_HUMAN Trans-2;3-enoyl-CoA reductase OS=Homo sapiens GN=TECR PE=2 SV=1
24.4845	24.6832	Up	0.00228871	2.59963	sp|Q7KZF4|SND1_HUMAN Staphylococcal nuclease domain-containing protein 1 OS=Homo sapiens GN=SND1 PE=1 SV=1		24.033	22.5174	Down	0.00261637	2.9718	sp|P30536|TSPOA_HUMAN Translocator protein OS=Homo sapiens GN=TSPO PE=1 SV=3
22.2064	21.9292	Down	0.00229524	2.55877	sp|O60812|HNRCL_HUMAN Heterogeneous nuclear ribonucleoprotein C-like 1 OS=Homo sapiens GN=HNRNPCL1 PE=1 SV=1		23.4135	23.6742	Up	0.0026212	2.92215	sp|O43809|CPSF5_HUMAN Cleavage and polyadenylation specificity factor subunit 5 OS=Homo sapiens GN=NUDT21 PE=1 SV=1
22.9137	23.1163	Up	0.00231453	2.53336	tr|Q5VZU9|Q5VZU9_HUMAN Tripeptidyl peptidase II OS=Homo sapiens GN=TPP2 PE=2 SV=1		24.5624	24.128	Down	0.00270273	2.95826	sp|Q03135|CAV1_HUMAN Caveolin-1 OS=Homo sapiens GN=CAV1 PE=1 SV=4
26.3464	26.0359	Down	0.00233071	2.50551	tr|A6NG51|A6NG51_HUMAN Spectrin alpha chain; brain OS=Homo sapiens GN=SPTAN1 PE=4 SV=2		26.6093	24.4291	Down	0.0028749	3.09052	sp|P52566|GDIR2_HUMAN Rho GDP-dissociation inhibitor 2 OS=Homo sapiens GN=ARHGDIB PE=1 SV=3
23.5546	24.3127	Up	0.0023471	2.47887	sp|P07305|H10_HUMAN Histone H1.0 OS=Homo sapiens GN=H1F0 PE=1 SV=3		20.5746	23.4337	Up	0.00302553	3.19539	sp|P50914|RL14_HUMAN 60S ribosomal protein L14 OS=Homo sapiens GN=RPL14 PE=1 SV=4
21.7552	22.7545	Up	0.0027797	2.88514	sp|P27695|APEX1_HUMAN DNA-(apurinic or apyrimidinic site) lyase OS=Homo sapiens GN=APEX1 PE=1 SV=2		21.7744	22.8868	Up	0.00308372	3.20069	sp|Q9Y5M8|SRPRB_HUMAN Signal recognition particle receptor subunit beta OS=Homo sapiens GN=SRPRB PE=1 SV=3
28.5961	28.435	Down	0.00288206	2.94068	sp|P35579|MYH9_HUMAN Myosin-9 OS=Homo sapiens GN=MYH9 PE=1 SV=4		24.1867	23.2256	Down	0.0031181	3.18152	sp|P13073|COX41_HUMAN Cytochrome c oxidase subunit 4 isoform 1; mitochondrial OS=Homo sapiens GN=COX4I1 PE=1 SV=1
23.1257	23.373	Up	0.00297301	2.98292	sp|O94826|TOM70_HUMAN Mitochondrial import receptor subunit TOM70 OS=Homo sapiens GN=TOMM70A PE=1 SV=1		24.5921	23.9419	Down	0.00315523	3.16575	sp|P29966|MARCS_HUMAN Myristoylated alanine-rich C-kinase substrate OS=Homo sapiens GN=MARCKS PE=1 SV=4
22.0968	22.8831	Up	0.00298095	2.94185	sp|O14967|CLGN_HUMAN Calmegin OS=Homo sapiens GN=CLGN PE=1 SV=1		22.3527	23.5084	Up	0.00344757	3.40236	sp|P49915|GUAA_HUMAN GMP synthase [glutamine-hydrolyzing] OS=Homo sapiens GN=GMPS PE=1 SV=1
21.8005	23.0238	Up	0.00310656	3.01637	sp|P10412|H14_HUMAN Histone H1.4 OS=Homo sapiens GN=HIST1H1E PE=1 SV=2		28.6147	23.8491	Down	0.00345017	3.35	tr|Q3KQS4|Q3KQS4_HUMAN NOP2 protein OS=Homo sapiens GN=NOP2 PE=2 SV=1
25.8022	26.1603	Up	0.00315712	3.01681	tr|B4DTG2|B4DTG2_HUMAN Elongation factor 1-gamma OS=Homo sapiens GN=EEF1G PE=2 SV=1		25.491	25.173	Down	0.00347435	3.31994	sp|Q01813|K6PP_HUMAN 6-phosphofructokinase type C OS=Homo sapiens GN=PFKP PE=1 SV=2
24.0122	24.1749	Up	0.00327835	3.0837	sp|O60841|IF2P_HUMAN Eukaryotic translation initiation factor 5B OS=Homo sapiens GN=EIF5B PE=1 SV=4		24.2189	22.2429	Down	0.00347482	3.26851	sp|Q13620|CUL4B_HUMAN Cullin-4B OS=Homo sapiens GN=CUL4B PE=1 SV=4
21.6854	22.0158	Up	0.00340187	3.15065	sp|O75312|ZPR1_HUMAN Zinc finger protein ZPR1 OS=Homo sapiens GN=ZNF259 PE=1 SV=1		23.9666	24.7386	Up	0.00353251	3.27165	sp|P21796|VDAC1_HUMAN Voltage-dependent anion-selective channel protein 1 OS=Homo sapiens GN=VDAC1 PE=1 SV=2
23.589	23.7315	Up	0.00351024	3.20176	sp|P20042|IF2B_HUMAN Eukaryotic translation initiation factor 2 subunit 2 OS=Homo sapiens GN=EIF2S2 PE=1 SV=2		24.6539	23.1272	Down	0.00364455	3.32427	sp|P61254|RL26_HUMAN 60S ribosomal protein L26 OS=Homo sapiens GN=RPL26 PE=1 SV=1
22.9391	22.5342	Down	0.00361506	3.24816	sp|O60488|ACSL4_HUMAN Long-chain-fatty-acid--CoA ligase 4 OS=Homo sapiens GN=ACSL4 PE=1 SV=2		23.927	26.1936	Up	0.00365831	3.28702	sp|P27797|CALR_HUMAN Calreticulin OS=Homo sapiens GN=CALR PE=1 SV=1
24.7732	24.5135	Down	0.00372065	3.29387	sp|Q15365|PCBP1_HUMAN Poly(rC)-binding protein 1 OS=Homo sapiens GN=PCBP1 PE=1 SV=2		23.5017	21.4127	Down	0.00366244	3.24234	sp|Q9UBB4|ATX10_HUMAN Ataxin-10 OS=Homo sapiens GN=ATXN10 PE=1 SV=1
23.136	23.2796	Up	0.00386514	3.37219	sp|O76094|SRP72_HUMAN Signal recognition particle 72 kDa protein OS=Homo sapiens GN=SRP72 PE=1 SV=3		24.0653	25.1354	Up	0.00369875	3.22703	tr|E7EX17|E7EX17_HUMAN Uncharacterized protein OS=Homo sapiens GN=EIF4B PE=4 SV=1
23.4812	23.5778	Up	0.00420984	3.62046	sp|Q13310-3|PABP4_HUMAN Isoform 3 of Polyadenylate-binding protein 4 OS=Homo sapiens GN=PABPC4		21.8428	22.5728	Up	0.00385221	3.3129	tr|F5H5D3|F5H5D3_HUMAN Tubulin alpha-1C chain OS=Homo sapiens GN=TUBA1C PE=3 SV=1
21.5964	21.2296	Down	0.00421149	3.57087	sp|P06396|GELS_HUMAN Gelsolin OS=Homo sapiens GN=GSN PE=1 SV=1		21.8887	23.3097	Up	0.00390788	3.31344	sp|Q9BR76|COR1B_HUMAN Coronin-1B OS=Homo sapiens GN=CORO1B PE=1 SV=1
24.94	25.0377	Up	0.00448361	3.7488	sp|Q86UP2|KTN1_HUMAN Kinectin OS=Homo sapiens GN=KTN1 PE=1 SV=1		24.0137	21.2296	Down	0.00396013	3.31111	sp|P06396|GELS_HUMAN Gelsolin OS=Homo sapiens GN=GSN PE=1 SV=1
21.9023	22.2289	Up	0.00459438	3.78879	sp|Q3ZCQ8-2|TIM50_HUMAN Isoform 2 of Mitochondrial import inner membrane translocase subunit TIM50 OS=Homo sapiens GN=TIMM50		26.3134	23.2796	Down	0.00398394	3.28539	sp|O76094|SRP72_HUMAN Signal recognition particle 72 kDa protein OS=Homo sapiens GN=SRP72 PE=1 SV=3
23.3228	23.4899	Up	0.00462783	3.7648	sp|Q00059|TFAM_HUMAN Transcription factor A; mitochondrial OS=Homo sapiens GN=TFAM PE=1 SV=1		21.791	23.2886	Up	0.00404824	3.2933	sp|P61158|ARP3_HUMAN Actin-related protein 3 OS=Homo sapiens GN=ACTR3 PE=1 SV=3
27.2378	26.9764	Down	0.00481312	3.86333	sp|P11021|GRP78_HUMAN 78 kDa glucose-regulated protein OS=Homo sapiens GN=HSPA5 PE=1 SV=2		22.1179	21.3436	Down	0.0041191	3.30627	sp|P31942|HNRH3_HUMAN Heterogeneous nuclear ribonucleoprotein H3 OS=Homo sapiens GN=HNRNPH3 PE=1 SV=2
24.3957	24.1277	Down	0.00485841	3.84837	sp|P67936|TPM4_HUMAN Tropomyosin alpha-4 chain OS=Homo sapiens GN=TPM4 PE=1 SV=3		24.6527	24.9831	Up	0.00418564	3.31547	sp|Q9P2E9|RRBP1_HUMAN Ribosome-binding protein 1 OS=Homo sapiens GN=RRBP1 PE=1 SV=4
24.3735	24.5868	Up	0.00488807	3.82158	sp|P11216|PYGB_HUMAN Glycogen phosphorylase; brain form OS=Homo sapiens GN=PYGB PE=1 SV=5		26.6819	23.5778	Down	0.00419287	3.27806	sp|Q13310-3|PABP4_HUMAN Isoform 3 of Polyadenylate-binding protein 4 OS=Homo sapiens GN=PABPC4
24.2813	24.5219	Up	0.00506251	3.90722	sp|Q9Y2X3|NOP58_HUMAN Nucleolar protein 58 OS=Homo sapiens GN=NOP58 PE=1 SV=1		23.1256	22.3664	Down	0.004223	3.25929	sp|P48147|PPCE_HUMAN Prolyl endopeptidase OS=Homo sapiens GN=PREP PE=1 SV=2
23.4189	23.1728	Down	0.00519508	3.95878	sp|Q15019-2|SEPT2_HUMAN Isoform 2 of Septin-2 OS=Homo sapiens GN=SEPT2		24.2265	24.4103	Up	0.00425914	3.24557	sp|P54136|SYRC_HUMAN Arginine--tRNA ligase; cytoplasmic OS=Homo sapiens GN=RARS PE=1 SV=2
24.5146	24.2075	Down	0.00548241	4.12551	sp|Q01082|SPTB2_HUMAN Spectrin beta chain; brain 1 OS=Homo sapiens GN=SPTBN1 PE=1 SV=2		24.0333	24.4698	Up	0.00431138	3.24432	tr|E9PRY8|E9PRY8_HUMAN Elongation factor 1-delta OS=Homo sapiens GN=EEF1D PE=3 SV=1
22.4441	22.2269	Down	0.00579985	4.31051	sp|Q96CT7|CC124_HUMAN Coiled-coil domain-containing protein 124 OS=Homo sapiens GN=CCDC124 PE=1 SV=1		25.6719	21.3115	Down	0.00433925	3.22498	sp|O60716|CTND1_HUMAN Catenin delta-1 OS=Homo sapiens GN=CTNND1 PE=1 SV=1
23.2029	22.9634	Down	0.00588789	4.32257	sp|P35659|DEK_HUMAN Protein DEK OS=Homo sapiens GN=DEK PE=1 SV=1		22.6381	19.788	Down	0.00435609	3.19801	tr|H0YE58|H0YE58_HUMAN Elongation factor 1-delta (Fragment) OS=Homo sapiens GN=EEF1D PE=4 SV=1
23.6412	23.2887	Down	0.0059448	4.31177	sp|Q13185|CBX3_HUMAN Chromobox protein homolog 3 OS=Homo sapiens GN=CBX3 PE=1 SV=4		25.8471	23.9288	Down	0.00436185	3.16366	sp|P04637|P53_HUMAN Cellular tumor antigen p53 OS=Homo sapiens GN=TP53 PE=1 SV=4
21.5393	22.3951	Up	0.00598495	4.28921	sp|O43493|TGON2_HUMAN Trans-Golgi network integral membrane protein 2 OS=Homo sapiens GN=TGOLN2 PE=1 SV=2		21.6834	23.1353	Up	0.00448671	3.21547	sp|P47897|SYQ_HUMAN Glutamine--tRNA ligase OS=Homo sapiens GN=QARS PE=1 SV=1
24.1129	24.2205	Up	0.00604341	4.28016	sp|P38159|RBMX_HUMAN RNA-binding motif protein; X chromosome OS=Homo sapiens GN=RBMX PE=1 SV=3		25.7626	23.8878	Down	0.004601	3.25859	tr|G3V1M7|G3V1M7_HUMAN Acyl-Coenzyme A dehydrogenase; very long chain; isoform CRA_b OS=Homo sapiens GN=ACADVL PE=3 SV=1
22.1495	21.8521	Down	0.00641572	4.491	sp|P63151-2|2ABA_HUMAN Isoform 2 of Serine/threonine-protein phosphatase 2A 55 kDa regulatory subunit B alpha isoform OS=Homo sapiens GN=PPP2R2A		26.6742	25.1376	Down	0.00494266	3.45986	sp|Q96AG4|LRC59_HUMAN Leucine-rich repeat-containing protein 59 OS=Homo sapiens GN=LRRC59 PE=1 SV=1
23.3234	23.017	Down	0.00645257	4.46488	tr|B4DT67|B4DT67_HUMAN SPATS2-like protein OS=Homo sapiens GN=SPATS2L PE=2 SV=1		22.8912	24.7548	Up	0.00519299	3.59331	sp|P49773|HINT1_HUMAN Histidine triad nucleotide-binding protein 1 OS=Homo sapiens GN=HINT1 PE=1 SV=2
22.8722	23.7239	Up	0.00651695	4.45819	tr|F5H1X1|F5H1X1_HUMAN Ferritin OS=Homo sapiens GN=FTL PE=3 SV=1		25.4929	23.0042	Down	0.00522026	3.57114	sp|P39656|OST48_HUMAN Dolichyl-diphosphooligosaccharide--protein glycosyltransferase 48 kDa subunit OS=Homo sapiens GN=DDOST PE=1 SV=4
26.6475	26.4295	Down	0.00672536	4.54907	sp|Q9Y490|TLN1_HUMAN Talin-1 OS=Homo sapiens GN=TLN1 PE=1 SV=3		24.7723	24.3422	Down	0.00539044	3.64612	sp|P62081|RS7_HUMAN 40S ribosomal protein S7 OS=Homo sapiens GN=RPS7 PE=1 SV=1
25.226	25.0565	Down	0.00692322	4.63086	sp|P39019|RS19_HUMAN 40S ribosomal protein S19 OS=Homo sapiens GN=RPS19 PE=1 SV=2		23.9781	22.6387	Down	0.00545854	3.65116	sp|P46779|RL28_HUMAN 60S ribosomal protein L28 OS=Homo sapiens GN=RPL28 PE=1 SV=3
23.9728	24.3002	Up	0.00695732	4.60253	sp|Q9BVP2|GNL3_HUMAN Guanine nucleotide-binding protein-like 3 OS=Homo sapiens GN=GNL3 PE=1 SV=2		22.5642	20.4248	Down	0.00550416	3.64121	sp|Q9NZN4|EHD2_HUMAN EH domain-containing protein 2 OS=Homo sapiens GN=EHD2 PE=1 SV=2
22.1967	21.9541	Down	0.00704382	4.60911	tr|F5H0X5|F5H0X5_HUMAN Transcription activator BRG1 OS=Homo sapiens GN=SMARCA4 PE=4 SV=1		23.72	22.6201	Down	0.00569138	3.72414	sp|P30740|ILEU_HUMAN Leukocyte elastase inhibitor OS=Homo sapiens GN=SERPINB1 PE=1 SV=1
21.3512	21.1201	Down	0.00709477	4.59253	sp|Q9UI26-2|IPO11_HUMAN Isoform 2 of Importin-11 OS=Homo sapiens GN=IPO11		23.2004	24.7539	Up	0.00581909	3.76677	sp|Q14978-2|NOLC1_HUMAN Isoform Beta of Nucleolar and coiled-body phosphoprotein 1 OS=Homo sapiens GN=NOLC1
24.8605	24.7553	Down	0.00736968	4.71973	sp|P22314|UBA1_HUMAN Ubiquitin-like modifier-activating enzyme 1 OS=Homo sapiens GN=UBA1 PE=1 SV=3		25.5903	23.5001	Down	0.00583428	3.73642	sp|P50502|F10A1_HUMAN Hsc70-interacting protein OS=Homo sapiens GN=ST13 PE=1 SV=2
23.199	23.3742	Up	0.00739229	4.68438	sp|P61163|ACTZ_HUMAN Alpha-centractin OS=Homo sapiens GN=ACTR1A PE=1 SV=1		23.3183	19.6975	Down	0.00586845	3.71874	tr|Q53FA3|Q53FA3_HUMAN Heat shock 70 kDa protein 1-like (Fragment) OS=Homo sapiens GN=HSPA1L PE=2 SV=1
21.7909	21.5864	Down	0.00748807	4.69565	sp|Q2TAY7|SMU1_HUMAN WD40 repeat-containing protein SMU1 OS=Homo sapiens GN=SMU1 PE=1 SV=2		22.1416	23.1137	Up	0.00590967	3.70585	sp|P09622|DLDH_HUMAN Dihydrolipoyl dehydrogenase; mitochondrial OS=Homo sapiens GN=DLD PE=1 SV=2
23.202	23.5847	Up	0.00751741	4.66545	sp|Q9NQC3|RTN4_HUMAN Reticulon-4 OS=Homo sapiens GN=RTN4 PE=1 SV=2		22.7258	22.8958	Up	0.00591533	3.67116	sp|Q9Y520-7|PRC2C_HUMAN Isoform 7 of Protein PRRC2C OS=Homo sapiens GN=PRRC2C
21.8203	21.995	Up	0.00775656	4.76474	sp|Q8WZA9|IRGQ_HUMAN Immunity-related GTPase family Q protein OS=Homo sapiens GN=IRGQ PE=1 SV=1		23.0302	23.6362	Up	0.00619805	3.80738	sp|Q9UL46|PSME2_HUMAN Proteasome activator complex subunit 2 OS=Homo sapiens GN=PSME2 PE=1 SV=4
24.7765	24.9202	Up	0.0077745	4.72752	sp|P35232|PHB_HUMAN Prohibitin OS=Homo sapiens GN=PHB PE=1 SV=1		22.754	23.2112	Up	0.00630633	3.83476	sp|Q9UNH7|SNX6_HUMAN Sorting nexin-6 OS=Homo sapiens GN=SNX6 PE=1 SV=1
21.8945	22.2001	Up	0.00780978	4.70149	sp|O60220|TIM8A_HUMAN Mitochondrial import inner membrane translocase subunit Tim8 A OS=Homo sapiens GN=TIMM8A PE=1 SV=1		27.1401	23.3605	Down	0.00643251	3.87237	sp|Q9UNF1|MAGD2_HUMAN Melanoma-associated antigen D2 OS=Homo sapiens GN=MAGED2 PE=1 SV=2
23.7964	24.0002	Up	0.00795579	4.74196	sp|O00567|NOP56_HUMAN Nucleolar protein 56 OS=Homo sapiens GN=NOP56 PE=1 SV=4		22.8571	24.2606	Up	0.00643763	3.83708	sp|P04792|HSPB1_HUMAN Heat shock protein beta-1 OS=Homo sapiens GN=HSPB1 PE=1 SV=2
23.4174	23.7838	Up	0.00803173	4.74029	tr|Q32Q12|Q32Q12_HUMAN Nucleoside diphosphate kinase OS=Homo sapiens GN=NME1-NME2 PE=2 SV=1		21.8691	24.1065	Up	0.00649996	3.83625	sp|O14980|XPO1_HUMAN Exportin-1 OS=Homo sapiens GN=XPO1 PE=1 SV=1
24.6049	24.9955	Up	0.0081209	4.74639	sp|P49591|SYSC_HUMAN Serine--tRNA ligase; cytoplasmic OS=Homo sapiens GN=SARS PE=1 SV=3		24.3175	24.0002	Down	0.00667827	3.90322	sp|O00567|NOP56_HUMAN Nucleolar protein 56 OS=Homo sapiens GN=NOP56 PE=1 SV=4
25.5273	25.6956	Up	0.00821078	4.75278	tr|B4DR52|B4DR52_HUMAN Histone H2B OS=Homo sapiens GN=HIST2H2BF PE=2 SV=1		24.2256	18.8054	Down	0.00691519	4.00283	sp|Q9UBF2|COPG2_HUMAN Coatomer subunit gamma-2 OS=Homo sapiens GN=COPG2 PE=1 SV=1
23.9079	23.4957	Down	0.00845134	4.84544	sp|P48735|IDHP_HUMAN Isocitrate dehydrogenase [NADP]; mitochondrial OS=Homo sapiens GN=IDH2 PE=1 SV=2		21.7898	23.8062	Up	0.00723427	4.14765	sp|P34897|GLYM_HUMAN Serine hydroxymethyltransferase; mitochondrial OS=Homo sapiens GN=SHMT2 PE=1 SV=3
22.9481	23.1382	Up	0.00876115	4.97567	tr|E9PF86|E9PF86_HUMAN Phosphoacetylglucosamine mutase OS=Homo sapiens GN=PGM3 PE=3 SV=1		25.2631	24.866	Down	0.00726754	4.12741	sp|P37837|TALDO_HUMAN Transaldolase OS=Homo sapiens GN=TALDO1 PE=1 SV=2
24.5493	24.7955	Up	0.00877685	4.938	sp|Q9Y617|SERC_HUMAN Phosphoserine aminotransferase OS=Homo sapiens GN=PSAT1 PE=1 SV=2		27.0054	22.2123	Down	0.00729594	4.10482	sp|Q9UBT2|SAE2_HUMAN SUMO-activating enzyme subunit 2 OS=Homo sapiens GN=UBA2 PE=1 SV=2
							22.4187	23.0394	Up	0.00759597	4.23405	sp|P28482|MK01_HUMAN Mitogen-activated protein kinase 1 OS=Homo sapiens GN=MAPK1 PE=1 SV=3
							23.833	21.6325	Down	0.00773878	4.27408	sp|Q01518-2|CAP1_HUMAN Isoform 2 of Adenylyl cyclase-associated protein 1 OS=Homo sapiens GN=CAP1
							24.4167	23.5727	Down	0.00783316	4.28687	tr|F8W727|F8W727_HUMAN 60S ribosomal protein L32 OS=Homo sapiens GN=RPL32 PE=4 SV=1
							23.9399	23.5517	Down	0.00787015	4.26832	tr|Q5JWU6|Q5JWU6_HUMAN Tumor protein D52-like 2 OS=Homo sapiens GN=TPD52L2 PE=2 SV=1
							24.8266	24.7119	Down	0.00787023	4.23025	sp|P00505|AATM_HUMAN Aspartate aminotransferase; mitochondrial OS=Homo sapiens GN=GOT2 PE=1 SV=3
							23.7324	23.7344	Up	0.0079559	4.23845	sp|P40429|RL13A_HUMAN 60S ribosomal protein L13a OS=Homo sapiens GN=RPL13A PE=1 SV=2
							24.5468	26.7617	Up	0.00795717	4.20194	sp|P07355-2|ANXA2_HUMAN Isoform 2 of Annexin A2 OS=Homo sapiens GN=ANXA2
							23.0108	22.3311	Down	0.00797497	4.17473	tr|E9PFW3|E9PFW3_HUMAN AP-2 complex subunit mu OS=Homo sapiens GN=AP2M1 PE=4 SV=1
							23.742	21.4141	Down	0.0080719	4.18904	sp|Q6P2I3|FAH2B_HUMAN Fumarylacetoacetate hydrolase domain-containing protein 2B OS=Homo sapiens GN=FAHD2B PE=1 SV=1
							26.1029	24.5332	Down	0.00819867	4.21846	sp|P31153|METK2_HUMAN S-adenosylmethionine synthase isoform type-2 OS=Homo sapiens GN=MAT2A PE=1 SV=1
							23.4944	21.9846	Down	0.00824199	4.20481	tr|F5H4R9|F5H4R9_HUMAN Dynamin-2 OS=Homo sapiens GN=DNM2 PE=3 SV=1
							23.6241	23.8001	Up	0.0083609	4.22963	sp|P20618|PSB1_HUMAN Proteasome subunit beta type-1 OS=Homo sapiens GN=PSMB1 PE=1 SV=2
							22.3787	23.8388	Up	0.00839076	4.20936	sp|P31040|DHSA_HUMAN Succinate dehydrogenase [ubiquinone] flavoprotein subunit; mitochondrial OS=Homo sapiens GN=SDHA PE=1 SV=2
							23.9929	23.7239	Down	0.00847526	4.21662	tr|F5H1X1|F5H1X1_HUMAN Ferritin OS=Homo sapiens GN=FTL PE=3 SV=1
							27.9638	23.017	Down	0.00860008	4.24365	tr|B4DT67|B4DT67_HUMAN SPATS2-like protein OS=Homo sapiens GN=SPATS2L PE=2 SV=1
							21.3823	24.1118	Up	0.00876421	4.28948	sp|P30041|PRDX6_HUMAN Peroxiredoxin-6 OS=Homo sapiens GN=PRDX6 PE=1 SV=3
							23.6812	24.5469	Up	0.00894262	4.3415	sp|P09429|HMGB1_HUMAN High mobility group protein B1 OS=Homo sapiens GN=HMGB1 PE=1 SV=3
							22.2312	21.3924	Down	0.00894416	4.30751	tr|F5H7I1|F5H7I1_HUMAN Protein diaphanous homolog 2 OS=Homo sapiens GN=DIAPH2 PE=4 SV=1
							25.4461	23.452	Down	0.00915231	4.37277	tr|B4DUT8|B4DUT8_HUMAN Calponin-2 OS=Homo sapiens GN=CNN2 PE=2 SV=1
							23.4638	20.2703	Down	0.00934226	4.42838	sp|Q9H9B4|SFXN1_HUMAN Sideroflexin-1 OS=Homo sapiens GN=SFXN1 PE=1 SV=4
							23.481	22.5923	Down	0.00938481	4.4138	sp|P63000-2|RAC1_HUMAN Isoform B of Ras-related C3 botulinum toxin substrate 1 OS=Homo sapiens GN=RAC1
							23.3149	25.0968	Up	0.00972616	4.53887	sp|P06576|ATPB_HUMAN ATP synthase subunit beta; mitochondrial OS=Homo sapiens GN=ATP5B PE=1 SV=3
							24.5135	24.9229	Up	0.00979308	4.53495	sp|P46940|IQGA1_HUMAN Ras GTPase-activating-like protein IQGAP1 OS=Homo sapiens GN=IQGAP1 PE=1 SV=1
							24.8431	25.1849	Up	0.0099527	4.57368	sp|P11586|C1TC_HUMAN C-1-tetrahydrofolate synthase; cytoplasmic OS=Homo sapiens GN=MTHFD1 PE=1 SV=3
							26.1918	22.8569	Down	0.0100522	4.58442	sp|P62873|GBB1_HUMAN Guanine nucleotide-binding protein G(I)/G(S)/G(T) subunit beta-1 OS=Homo sapiens GN=GNB1 PE=1 SV=3
							24.7299	23.1948	Down	0.0102363	4.63328	sp|Q9NYF8|BCLF1_HUMAN Bcl-2-associated transcription factor 1 OS=Homo sapiens GN=BCLAF1 PE=1 SV=2
							20.9183	24.0852	Up	0.0102373	4.59913	sp|P08621|RU17_HUMAN U1 small nuclear ribonucleoprotein 70 kDa OS=Homo sapiens GN=SNRNP70 PE=1 SV=2
							23.3862	23.898	Up	0.0105555	4.70698	sp|Q9BUF5|TBB6_HUMAN Tubulin beta-6 chain OS=Homo sapiens GN=TUBB6 PE=1 SV=1
							22.1717	23.2704	Up	0.0105822	4.68419	tr|B1AVU8|B1AVU8_HUMAN Proactivator polypeptide OS=Homo sapiens GN=PSAP PE=4 SV=1
							22.4241	25.3185	Up	0.0107913	4.74189	sp|P31939|PUR9_HUMAN Bifunctional purine biosynthesis protein PURH OS=Homo sapiens GN=ATIC PE=1 SV=3
							25.0689	21.1097	Down	0.0111174	4.84977	sp|P16403|H12_HUMAN Histone H1.2 OS=Homo sapiens GN=HIST1H1C PE=1 SV=2
							23.443	22.4038	Down	0.011254	4.87403	sp|Q99536|VAT1_HUMAN Synaptic vesicle membrane protein VAT-1 homolog OS=Homo sapiens GN=VAT1 PE=1 SV=2
							22.004	23.9848	Up	0.0113726	4.89024	tr|H3BPE7|H3BPE7_HUMAN RNA-binding protein FUS OS=Homo sapiens GN=FUS PE=4 SV=1
							22.2057	23.7304	Up	0.0114278	4.87912	sp|P62917|RL8_HUMAN 60S ribosomal protein L8 OS=Homo sapiens GN=RPL8 PE=1 SV=2
							22.9796	23.3082	Up	0.0115154	4.88187	sp|P13804|ETFA_HUMAN Electron transfer flavoprotein subunit alpha; mitochondrial OS=Homo sapiens GN=ETFA PE=1 SV=1
							22.1894	24.0726	Up	0.0115277	4.85291	sp|P49753|ACOT2_HUMAN Acyl-coenzyme A thioesterase 2; mitochondrial OS=Homo sapiens GN=ACOT2 PE=1 SV=6
							22.366	24.5301	Up	0.0115978	4.84852	sp|P46777|RL5_HUMAN 60S ribosomal protein L5 OS=Homo sapiens GN=RPL5 PE=1 SV=3
							23.4151	21.9086	Down	0.0117172	4.86466	sp|Q5VTR2|BRE1A_HUMAN E3 ubiquitin-protein ligase BRE1A OS=Homo sapiens GN=RNF20 PE=1 SV=2
							21.8219	22.4625	Up	0.0119681	4.93481	sp|P18085|ARF4_HUMAN ADP-ribosylation factor 4 OS=Homo sapiens GN=ARF4 PE=1 SV=3
							24.8467	24.0334	Down	0.0119917	4.91091	sp|Q86VP6|CAND1_HUMAN Cullin-associated NEDD8-dissociated protein 1 OS=Homo sapiens GN=CAND1 PE=1 SV=2
							26.351	24.1356	Down	0.0121865	4.95693	sp|P36957|ODO2_HUMAN Dihydrolipoyllysine-residue succinyltransferase component of 2-oxoglutarate dehydrogenase complex; mitochondrial OS=Homo sapiens GN=DLST PE=1 SV=4
							24.3123	22.5649	Down	0.0123579	4.99291	sp|Q14498|RBM39_HUMAN RNA-binding protein 39 OS=Homo sapiens GN=RBM39 PE=1 SV=2
